# Supplementary material
Source: publisher figshare collection journal article supplement (https://frontiersin.figshare.com/ndownloader/files/20261505)
Supplement: Supplementary file [file 20261505]

# Fig. S1

## Primers used for pEDS mutants and Fg40 engineering

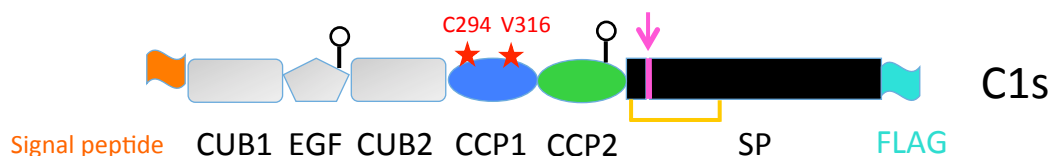

### Cloning of pcDNA3.1 C1s WT FLAG

cta gctagc ATG TGG TGC ATT GTC CTG TTT TCA C Forward primer  
 NheI M W C I V L F S

CCC CGT GAG GAC GAT TAC AAG GAT GAC GAC GAT AAG TAA gaattc aaaggcc Reverse primer  
 P R E D D Y K D D D D K EcoRI

### Mutagenesis of pcDNA3.1 C1s C294R

CGC TAT CAT GGA GAT CCA ATG CCG **CGG** CCT AAG GAA GAC ACT CCC Forward primer  
 R Y H G D P M P **R** P K E D T P

### Mutagenesis of pcDNA3.1 C1s V316del

GCA AAA TAT GTC TTT AGA GAT GTG **del V** CAG ATA ACC TGT CTA GAT GGG TTT GAA GTT GTG G Forward primer  
 A K Y V F R D V Q I T C L D G F E V V

### Cloning of pcDNA3.1 Fg40 by deletion using site-directed mutagenesis

CAC TTT TGG CAT GGG TTT ATG CTT GTC AAC CTG TGG ACT GTG GC Forward primer  
 L L A W V Y A C Q P V D C G
